# Supplementary material for: Assessment of genotype by environment and yield performance of tropical maize hybrids using stability statistics and graphical biplots
Source: PeerJ. 2024 Nov 29;12:e18624. doi: 10.7717/peerj.18624 (PMC11610465; doi:10.7717/peerj.18624)
Supplement: Supplemental Information 1 — These data are used for all statistical analyses to determine yield performance and stability of hybrids. [file peerj-12-18624-s001.xlsx]

## Sheet: Sheet1
Environment (E)	Genotype (G)	Replication	GY
E01	G01	1	11.4777
E01	G01	2	14.1021
E01	G01	3	14.2863
E01	G02	1	13.1838
E01	G02	2	13.6223
E01	G02	3	13.7824
E01	G03	1	13.0773
E01	G03	2	13.8263
E01	G03	3	14.6155
E01	G04	1	12.3057
E01	G04	2	13.0171
E01	G04	3	13.4482
E01	G05	1	10.9552
E01	G05	2	12.3682
E01	G05	3	12.5454
E01	G06	1	11.5462
E01	G06	2	11.6718
E01	G06	3	11.3085
E01	G07	1	12.1075
E01	G07	2	12.9974
E01	G07	3	13.0688
E01	G08	1	10.2906
E01	G08	2	10.6866
E01	G08	3	11.5113
E01	G09	1	12.1558
E01	G09	2	12.7055
E01	G09	3	13.05
E01	G10	1	11.2759
E01	G10	2	12.7094
E01	G10	3	14.0729
E02	G01	1	13.5525
E02	G01	2	13.1324
E02	G01	3	12.9752
E02	G02	1	13.65
E02	G02	2	13.2961
E02	G02	3	11.2203
E02	G03	1	14.2094
E02	G03	2	12.3738
E02	G03	3	13.4072
E02	G04	1	12.5758
E02	G04	2	11.3963
E02	G04	3	11.1596
E02	G05	1	13.528
E02	G05	2	12.252
E02	G05	3	12.0662
E02	G06	1	13.2407
E02	G06	2	12.9525
E02	G06	3	9.95232
E02	G07	1	13.566
E02	G07	2	12.1649
E02	G07	3	11.6101
E02	G08	1	11.2269
E02	G08	2	11.6719
E02	G08	3	9.46113
E02	G09	1	12.8803
E02	G09	2	12.4228
E02	G09	3	9.9613
E02	G10	1	12.8304
E02	G10	2	11.895
E02	G10	3	10.4351
E03	G01	1	10.3126
E03	G01	2	9.9768
E03	G01	3	10.9665
E03	G02	1	10.3629
E03	G02	2	10.6487
E03	G02	3	10.4735
E03	G03	1	12.2797
E03	G03	2	12.3084
E03	G03	3	11.4543
E03	G04	1	10.716
E03	G04	2	11.7099
E03	G04	3	10.9359
E03	G05	1	11.0934
E03	G05	2	10.7566
E03	G05	3	10.3174
E03	G06	1	8.4515
E03	G06	2	7.61557
E03	G06	3	9.27262
E03	G07	1	11.5804
E03	G07	2	12.0097
E03	G07	3	12.5458
E03	G08	1	8.55147
E03	G08	2	8.90485
E03	G08	3	8.77026
E03	G09	1	10.689
E03	G09	2	10.4492
E03	G09	3	10.5592
E03	G10	1	10.6153
E03	G10	2	9.56801
E03	G10	3	10.1378
E04	G01	1	13.6815
E04	G01	2	14.5271
E04	G01	3	13.627
E04	G02	1	12.3562
E04	G02	2	12.1474
E04	G02	3	12.1886
E04	G03	1	13.519
E04	G03	2	12.9826
E04	G03	3	12.5658
E04	G04	1	12.588
E04	G04	2	12.3714
E04	G04	3	12.1177
E04	G05	1	13.3334
E04	G05	2	12.4766
E04	G05	3	12.6488
E04	G06	1	11.9609
E04	G06	2	12.3677
E04	G06	3	11.0253
E04	G07	1	12.1692
E04	G07	2	13.3295
E04	G07	3	12.9186
E04	G08	1	11.151
E04	G08	2	11.236
E04	G08	3	11.3615
E04	G09	1	13.3875
E04	G09	2	11.4058
E04	G09	3	13.5995
E04	G10	1	11.1601
E04	G10	2	13.0675
E04	G10	3	13.8239
E05	G01	1	13.6041
E05	G01	2	13.8354
E05	G01	3	13.924
E05	G02	1	12.8297
E05	G02	2	13.0746
E05	G02	3	12.6917
E05	G03	1	12.8296
E05	G03	2	13.2082
E05	G03	3	13.0624
E05	G04	1	12.6482
E05	G04	2	13.5029
E05	G04	3	13.4109
E05	G05	1	13.4171
E05	G05	2	13.8676
E05	G05	3	13.854
E05	G06	1	12.0668
E05	G06	2	10.4117
E05	G06	3	11.3592
E05	G07	1	13.3099
E05	G07	2	13.3236
E05	G07	3	13.4688
E05	G08	1	11.2023
E05	G08	2	12.3761
E05	G08	3	12.324
E05	G09	1	11.4135
E05	G09	2	11.0537
E05	G09	3	11.8104
E05	G10	1	11.4965
E05	G10	2	12.2292
E05	G10	3	9.52259
E06	G01	1	13.75
E06	G01	2	13.662
E06	G01	3	14.1991
E06	G02	1	12.572
E06	G02	2	13.7554
E06	G02	3	13.2047
E06	G03	1	14.711
E06	G03	2	13.8013
E06	G03	3	13.8316
E06	G04	1	11.6364
E06	G04	2	11.9265
E06	G04	3	11.9997
E06	G05	1	13.206
E06	G05	2	13.6176
E06	G05	3	13.5782
E06	G06	1	12.0126
E06	G06	2	12.2466
E06	G06	3	11.7281
E06	G07	1	13.5925
E06	G07	2	13.0164
E06	G07	3	13.6914
E06	G08	1	11.3456
E06	G08	2	12.0657
E06	G08	3	10.5823
E06	G09	1	10.2936
E06	G09	2	11.7688
E06	G09	3	10.4087
E06	G10	1	11.4
E06	G10	2	9.42195
E06	G10	3	10.0025
E07	G01	1	14.1333
E07	G01	2	12.5283
E07	G01	3	14.735
E07	G02	1	12.9021
E07	G02	2	11.0421
E07	G02	3	12.3001
E07	G03	1	14.1217
E07	G03	2	12.6226
E07	G03	3	13.5056
E07	G04	1	14.8317
E07	G04	2	13.4527
E07	G04	3	13.0142
E07	G05	1	12.4656
E07	G05	2	12.2138
E07	G05	3	11.33
E07	G06	1	12.5306
E07	G06	2	11.8744
E07	G06	3	12.0343
E07	G07	1	12.0374
E07	G07	2	13.2296
E07	G07	3	13.8173
E07	G08	1	12.0797
E07	G08	2	10.4809
E07	G08	3	9.9947
E07	G09	1	12.9925
E07	G09	2	13.5209
E07	G09	3	13.1788
E07	G10	1	10.2716
E07	G10	2	10.5187
E07	G10	3	10.9428
E08	G01	1	13.8366
E08	G01	2	14.2432
E08	G01	3	13.1954
E08	G02	1	11.5448
E08	G02	2	11.7409
E08	G02	3	12.772
E08	G03	1	12.5631
E08	G03	2	11.9732
E08	G03	3	13.2615
E08	G04	1	13.6964
E08	G04	2	12.3934
E08	G04	3	14.0076
E08	G05	1	12.7139
E08	G05	2	13.6626
E08	G05	3	14.1131
E08	G06	1	11.9599
E08	G06	2	12.5019
E08	G06	3	13.0368
E08	G07	1	11.7158
E08	G07	2	12.1457
E08	G07	3	13.5962
E08	G08	1	10.4572
E08	G08	2	11.1547
E08	G08	3	10.6109
E08	G09	1	11.9587
E08	G09	2	12.3126
E08	G09	3	12.0893
E08	G10	1	11.26
E08	G10	2	11.8145
E08	G10	3	11.9282
E09	G01	1	14.1364
E09	G01	2	14.5029
E09	G01	3	12.9571
E09	G02	1	13.5359
E09	G02	2	12.5691
E09	G02	3	12.3057
E09	G03	1	13.1078
E09	G03	2	11.9559
E09	G03	3	11.7709
E09	G04	1	12.3398
E09	G04	2	12.4774
E09	G04	3	13.1084
E09	G05	1	12.1525
E09	G05	2	13.552
E09	G05	3	13.4323
E09	G06	1	12.6282
E09	G06	2	11.8176
E09	G06	3	9.79251
E09	G07	1	11.7973
E09	G07	2	13.8158
E09	G07	3	10.271
E09	G08	1	12.395
E09	G08	2	12.5585
E09	G08	3	10.7929
E09	G09	1	12.0805
E09	G09	2	12.1287
E09	G09	3	12.8798
E09	G10	1	13.7095
E09	G10	2	12.123
E09	G10	3	12.4608
E10	G01	1	11.0386
E10	G01	2	13.6001
E10	G01	3	11.125
E10	G02	1	13.5463
E10	G02	2	13.6324
E10	G02	3	12.447
E10	G03	1	8.6033
E10	G03	2	9.67478
E10	G03	3	9.13362
E10	G04	1	13.3549
E10	G04	2	11.2823
E10	G04	3	11.0761
E10	G05	1	11.3664
E10	G05	2	11.0395
E10	G05	3	12.0963
E10	G06	1	9.49999
E10	G06	2	12.886
E10	G06	3	10.3607
E10	G07	1	10.3303
E10	G07	2	11.7478
E10	G07	3	9.68652
E10	G08	1	11.4376
E10	G08	2	12.3177
E10	G08	3	9.53395
E10	G09	1	9.242
E10	G09	2	8.6767
E10	G09	3	10.0341
E10	G10	1	9.47034
E10	G10	2	10.1768
E10	G10	3	8.57207
